# Supplementary material
Source: PubMed Central journal article supplement (PMC4903895)

## Top ten genes in Tissue-NPCs by expression level

A

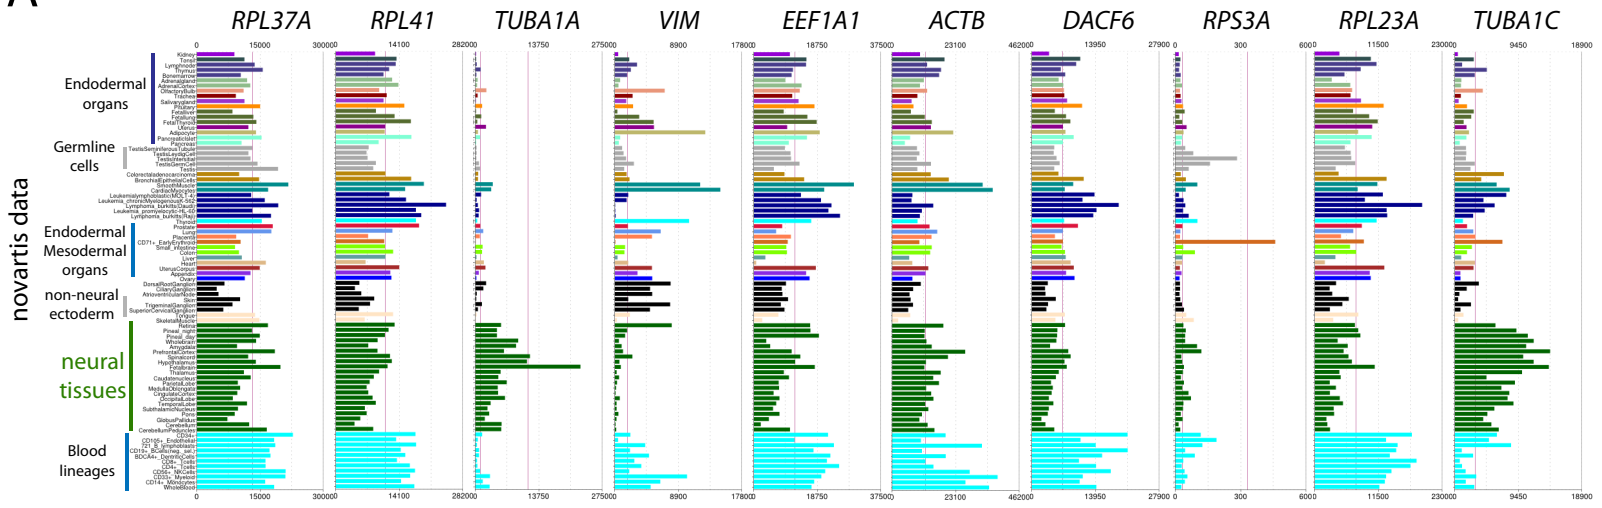

## Top ten genes in Tissue-NPCs by CEMA + expression level

B

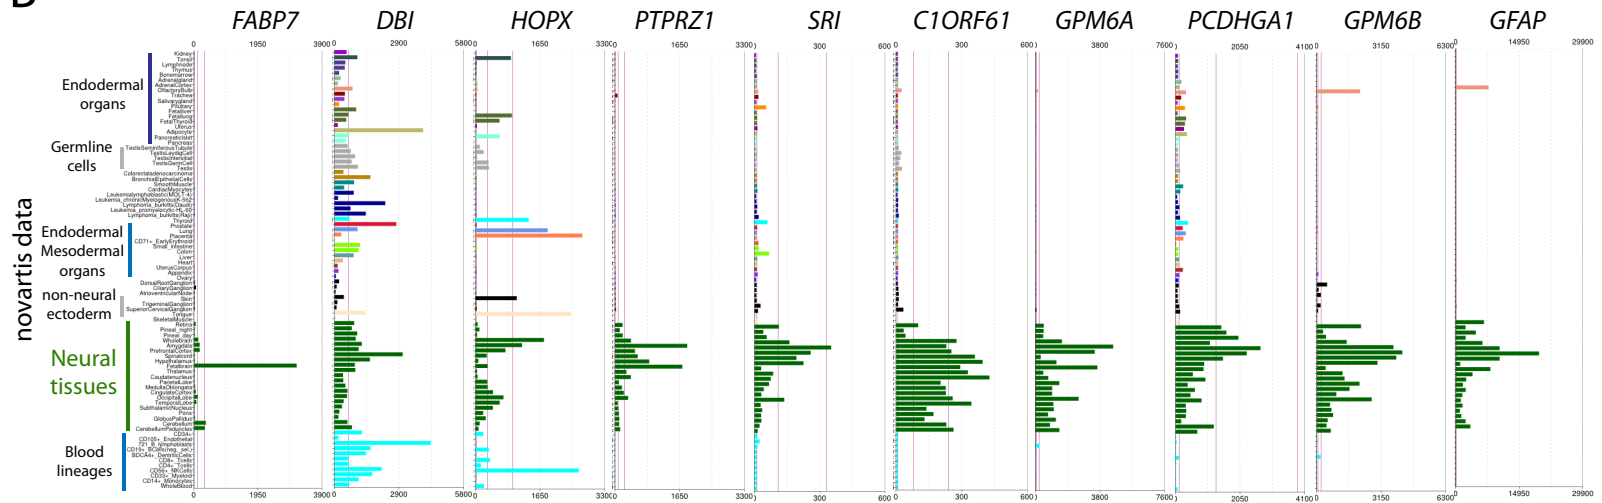

Supplement: NIHMS780844-supplement-1.pdf [file NIHMS780844-supplement-1.pdf]
