# Supplementary material
Source: PubMed Central journal article supplement (PMC4903895)

## Top ten genes in PSC-derived Hepatocytes by CEMA and expression level

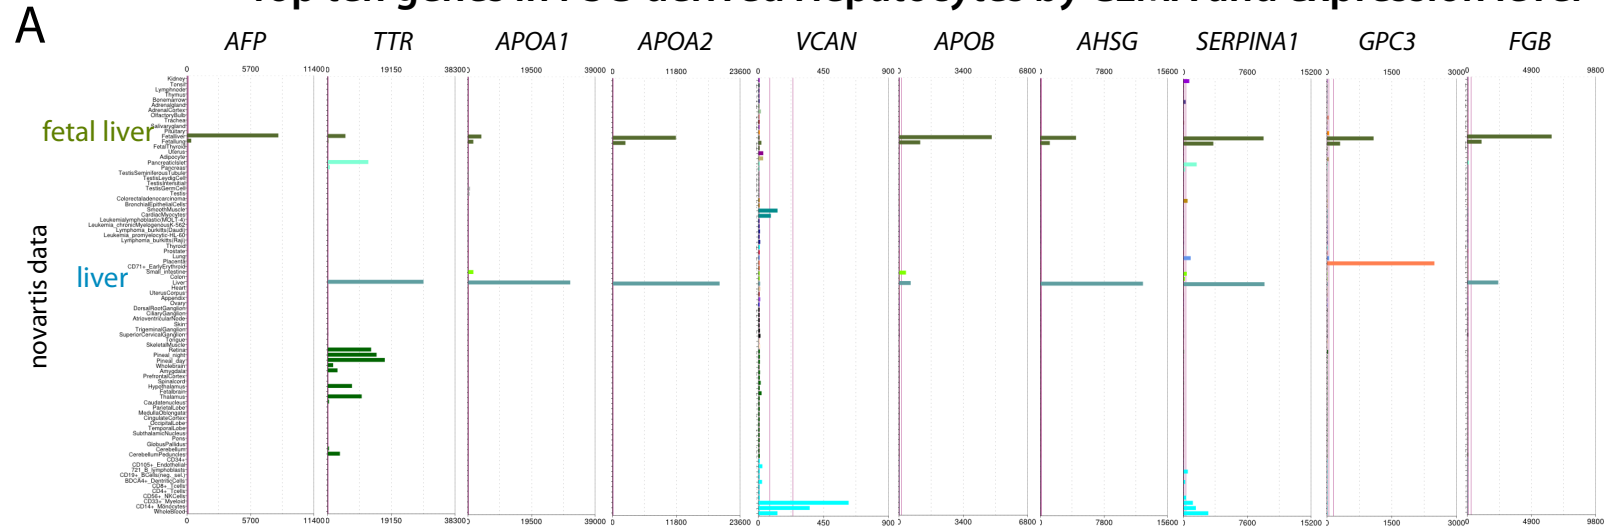

## Top ten genes in Adult Tissue-Hepatocytes by CEMA and expression level

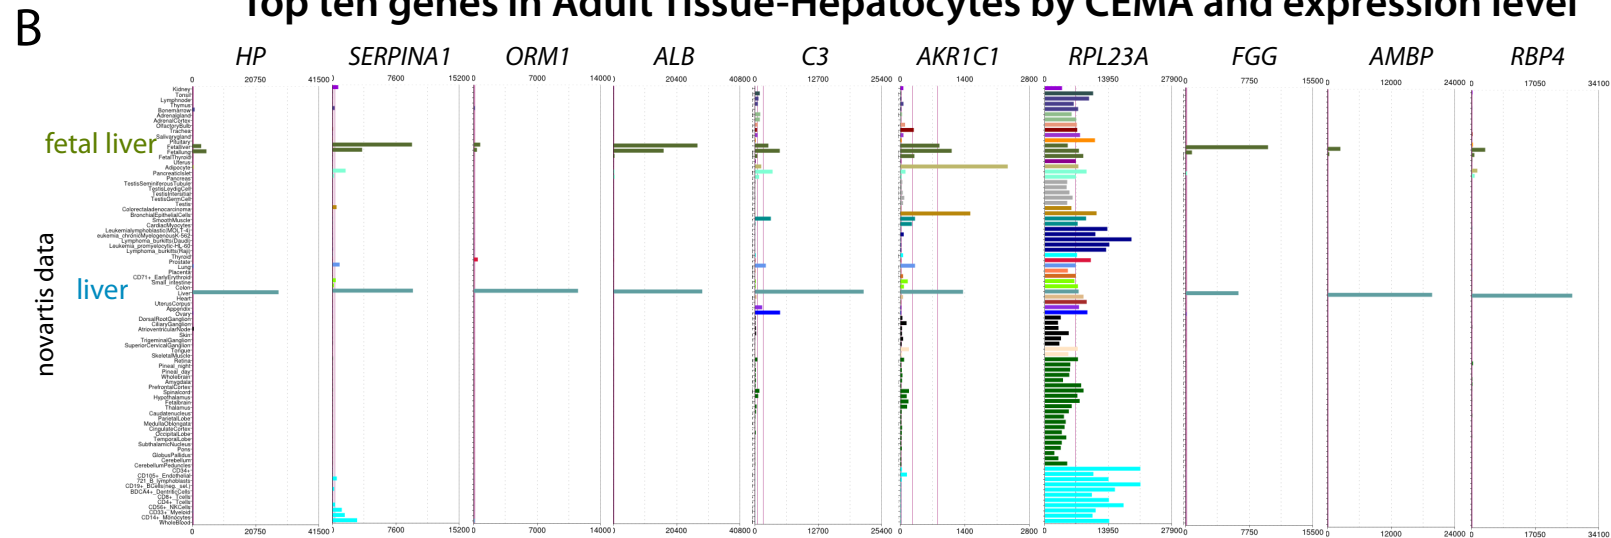

Supplement: NIHMS780844-supplement-2.pdf [file NIHMS780844-supplement-2.pdf]
