# Supplementary material
Source: PubMed Central journal article supplement (PMC4903895)
Supplement: NIHMS780844-supplement-3.pdf [file NIHMS780844-supplement-3.pdf]

A

| Gene   | AVG STDEV |      |
|--------|-----------|------|
|        | EXP       | EXP  |
| RPL41  | 14.42     | 0.07 |
| GUSB   | 6.00      | 0.13 |
| RPLP0  | 13.86     | 0.14 |
| TBP    | 8.92      | 0.27 |
| GAPDH  | 13.94     | 0.33 |
| SDHA   | 10.52     | 0.37 |
| HMBS   | 9.14      | 0.38 |
| GUSB   | 9.77      | 0.54 |
| SDHA   | 7.28      | 0.57 |
| PUM1   | 10.93     | 0.58 |
| ACTB   | 13.61     | 0.75 |
| HPRT1  | 10.63     | 0.91 |
| MRPL19 | 6.90      | 1.57 |
| PGK1   | 9.15      | 3.22 |
| PPIA   | 9.59      | 3.80 |
| B2M    | 9.97      | 4.12 |

B

| Gene    | AVG STDEV |      |
|---------|-----------|------|
|         | EXP       | EXP  |
| RPL41   | 14.42     | 0.07 |
| RPL23A  | 14.32     | 0.10 |
| EEF1A1  | 14.15     | 0.10 |
| SLC25A3 | 13.36     | 0.12 |
| RPLP1   | 13.96     | 0.12 |
| RPL39   | 14.12     | 0.13 |
| RPS17   | 13.91     | 0.13 |
| PARK7   | 12.93     | 0.13 |
| RPL30   | 13.86     | 0.14 |
| RPLP0   | 13.86     | 0.14 |
| RPL27   | 13.88     | 0.14 |
| RPS18   | 14.17     | 0.15 |
| RPL34   | 13.57     | 0.15 |
| RPS13   | 13.80     | 0.15 |
| RPL21   | 13.89     | 0.15 |
| RPL19   | 13.81     | 0.15 |
| WDR45L  | 10.20     | 0.15 |
| ACTG1   | 14.17     | 0.16 |
| RPS29   | 13.69     | 0.16 |
| NACAP1  | 11.38     | 0.16 |
| RPL24   | 13.59     | 0.16 |
| RPS12   | 13.90     | 0.16 |
| MRFAP1  | 13.14     | 0.16 |
| ATP5A1  | 13.29     | 0.16 |

high expression

C

| Gene      | AVG STDEV |      |
|-----------|-----------|------|
|           | EXP       | EXP  |
| CCDC127   | 9.15      | 0.15 |
| WDR45L    | 10.20     | 0.15 |
| NACAP1    | 11.38     | 0.16 |
| FRG1      | 9.84      | 0.17 |
| SRP68     | 10.51     | 0.17 |
| MRPL27    | 10.27     | 0.17 |
| EIF4H     | 11.74     | 0.18 |
| C2orf28   | 11.36     | 0.18 |
| RPL7L1    | 10.66     | 0.18 |
| AAMP      | 9.80      | 0.18 |
| POLR2C    | 9.93      | 0.18 |
| OPHN1     | 10.43     | 0.18 |
| UXT       | 11.02     | 0.18 |
| SEC24B    | 10.22     | 0.18 |
| LOC220906 | 9.71      | 0.19 |
| SETD1B    | 9.90      | 0.19 |
| TMEM203   | 9.62      | 0.19 |
| DDX19A    | 9.46      | 0.19 |
| COX6B1    | 11.38     | 0.20 |
| TMEM184C  | 9.64      | 0.20 |
| PCBP1     | 11.58     | 0.20 |
| XKR8      | 9.22      | 0.20 |
| RAB1B     | 10.05     | 0.20 |
| UFC1      | 10.94     | 0.21 |

mid expression

D

| Gene      | AVG STDEV |      |
|-----------|-----------|------|
|           | EXP       | EXP  |
| SIRT6     | 7.68      | 0.11 |
| RAX2      | 7.23      | 0.11 |
| LOC146429 | 7.29      | 0.11 |
| MUC8      | 7.98      | 0.13 |
| MAP3K10   | 7.51      | 0.13 |
| LOC647589 | 7.36      | 0.13 |
| PLB1      | 7.33      | 0.14 |
| TMEM105   | 7.46      | 0.14 |
| ZC3H3     | 7.19      | 0.14 |
| LINGO3    | 8.10      | 0.15 |
| CD300LG   | 7.68      | 0.15 |
| ASB10     | 8.00      | 0.15 |
| GSK3A     | 7.56      | 0.15 |
| STAC2     | 7.16      | 0.15 |
| SLC35A4   | 8.82      | 0.16 |
| SLC34A3   | 8.69      | 0.16 |
| HTR4      | 7.25      | 0.16 |
| KRTAP5-8  | 7.54      | 0.16 |
| ZNF490    | 7.09      | 0.16 |
| DHX38     | 7.70      | 0.16 |
| UTS2R     | 7.69      | 0.16 |
| SNORA78   | 7.08      | 0.16 |
| POLR2C    | 7.73      | 0.16 |
| ALG12     | 7.26      | 0.16 |

low expression
