# Supplementary material
Source: PubMed Central journal article supplement (PMC4903895)
Supplement: NIHMS780844-supplement-6.pdf [file NIHMS780844-supplement-6.pdf]

**Table S1. Primers used for qRT-PCR**

| <b>GENE</b> | <b>FORWARD</b>            | <b>REVERSE</b>           |
|-------------|---------------------------|--------------------------|
| GAPDH       | AGGGGTCTACATGGCAACTG      | GGGTTTTCCAGAACCACAGA     |
| CD31        | GCTGAAGGCTGAAAGACAGG      | GGCTGGTCTCAAACCTCCTGA    |
| CD34        | TTTGGGCCCTCTCCCATCC       | GCCGGTCCCGTTTTCTGAG      |
| VE-cadherin | CCGAGCCATGTGTCTTTACA      | TGAGCTTGGTGTCTCCTTCC     |
| GATA2       | CAGACGAAGGCAACCATTTT      | CAGAGGAGAAGAGGGTGCAG     |
| TAL1 UTR    | GTCCCAAATCCTTCCCAAGT      | GCTGACAACCCAGGTCTTA      |
| FLI1 UTR    | AGCGAGCTGGTCTATCCAGA      | GCGTTATTCTTTGCTGGAG      |
| FLI1 coding | GAGGGGGTTGATCTTGTGG       | GGATGCCTTCCCTATGTTCA     |
| SOX1        | AGAACCCCAAGATGCACAAC      | GCCAGCGAGTACTTGTCTT      |
| SOX2 UTR    | TTGTTCGATCCCAACTTTCC      | ACATGGATTCTCGGCAGACT     |
| HOPX UTR    | GGAGGAGACCCAGAAATGGT      | AACAGAGATGGCCTTCATGG     |
| GFAP        | TCTCTCGGAGTATCTGGGAAGT    | TTCCCTTCTGTCTGAGTCTCA    |
| MAP2        | GGGCCTTTTCTTTGAAATCTAGTTT | CAAATGTGGCTCTCTGAAGAACA  |
| PAX6        | CCAGCCAGACCTCCTCATAC      | TCACTTCCGGGAAGTGAAC      |
| N-cadherin  | TGTGGGAATCCGACGAATGGATGA  | TGGAGCCACTGCCTTCATAGTCAA |
| CD44        | TCTCAAGGGCGTAACTCTGG      | GCCAATTCTACCAGGCTTGA     |
| CD73        | TCTGCCTCCAAATCTGAACA      | TCTAGCTGCCATTTGCACAC     |
| LIN28B      | GCCCCTTGGATATTCCAGTC      | TGACTCAAGGCCTTTGGAAG     |
| HMGA2       | ACTTCAGCCCAGGGACAAC       | TTGAGCTGCTTTAGAGGGAC     |
